# Supplementary material
Source: Springer Nature journal article supplement (https://www.springermedizin.de/resource/supplementary/12974_2004_21_MOESM2_ESM.pdf/9600010)

**GFAP/Actin  
(ratio)**

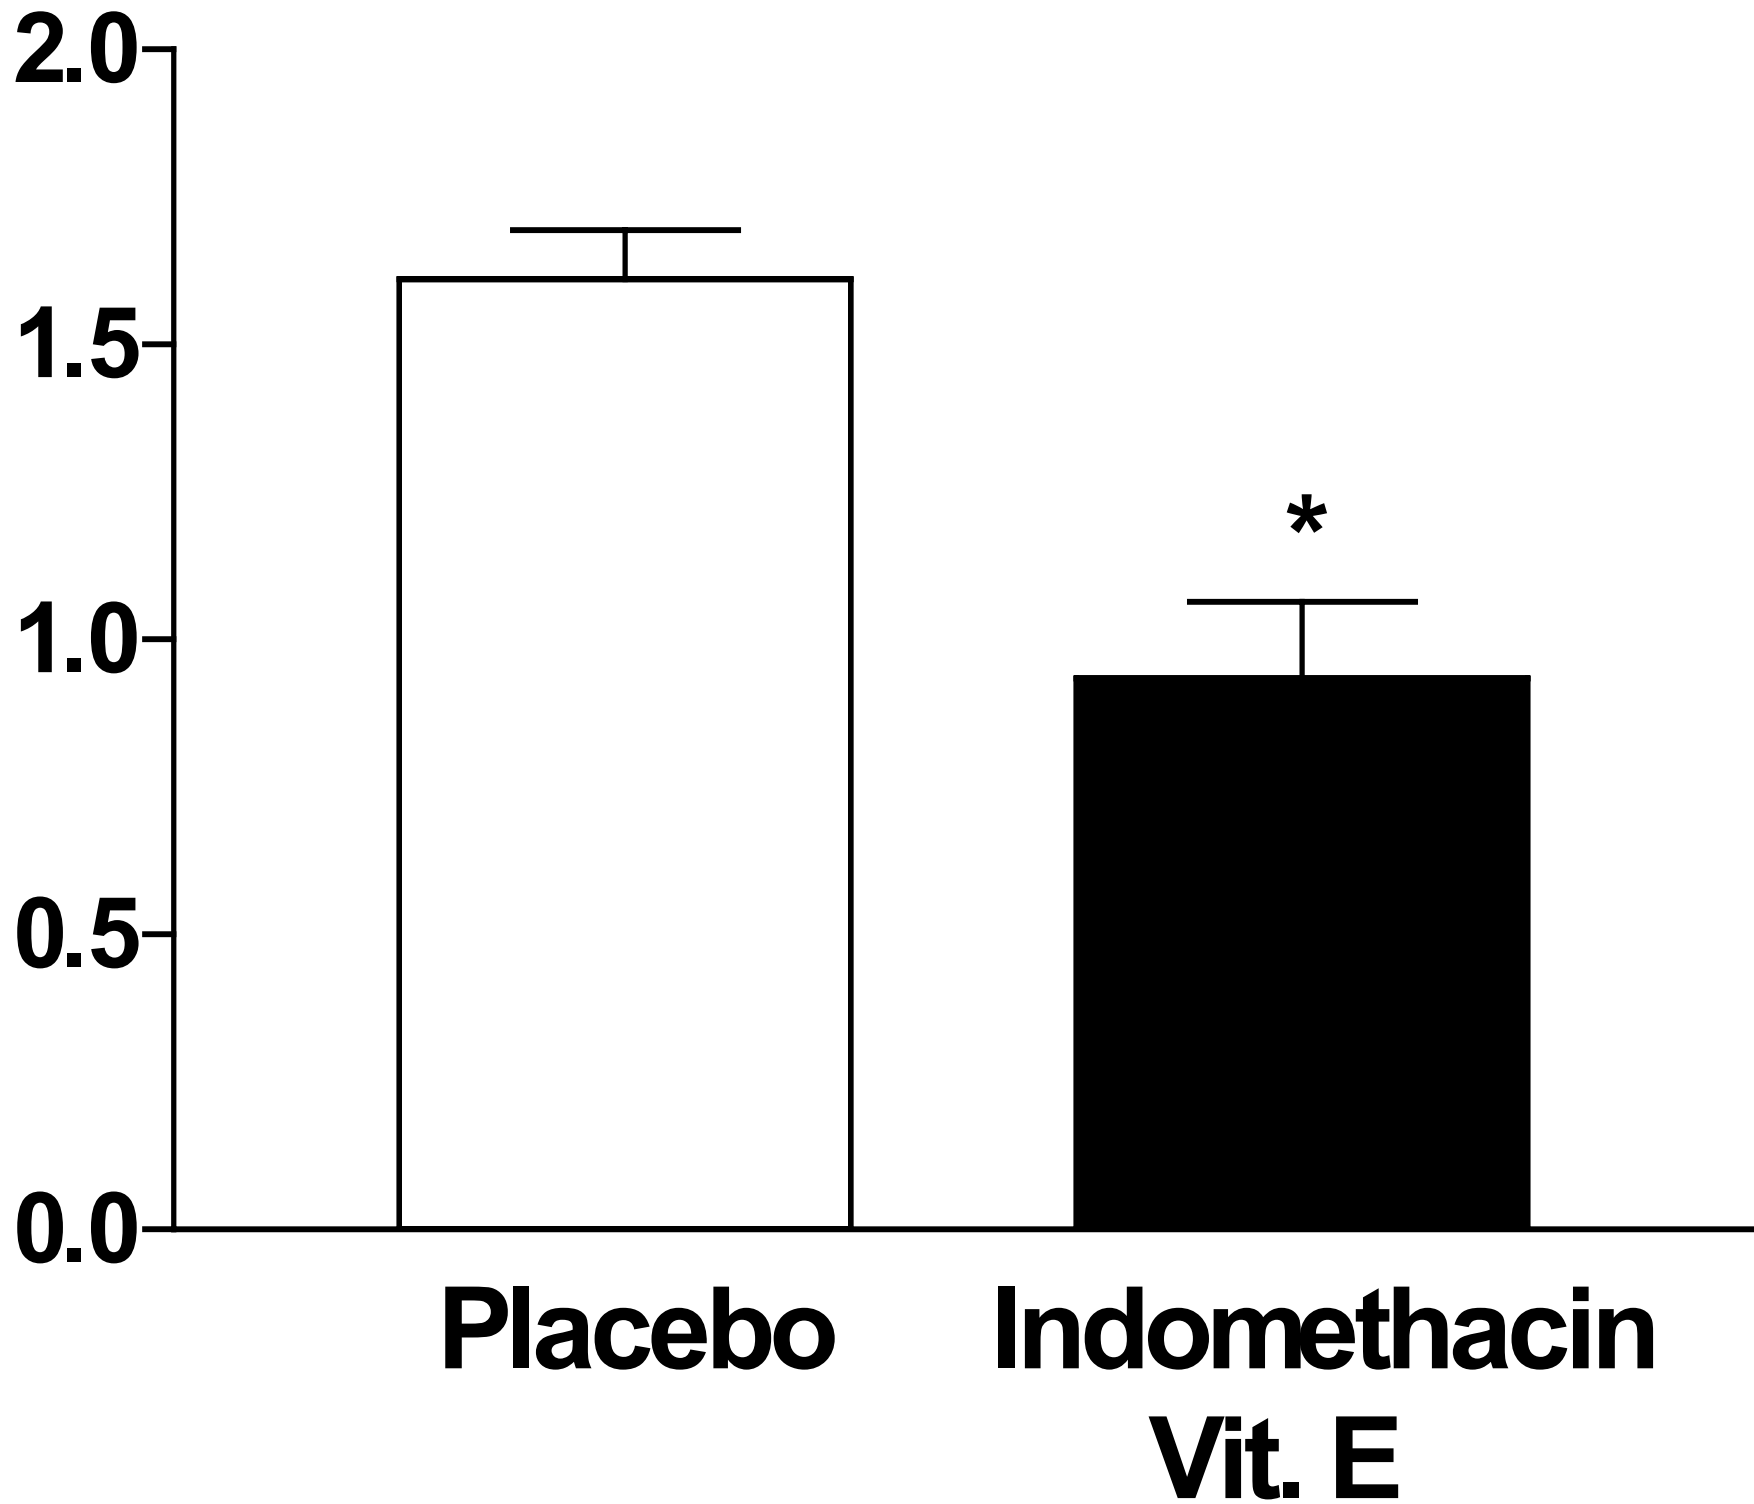

Supplement: MOESM2 [file 9600010]
